# Supplementary material
Source: publisher site journal article supplement (https://www.dovepress.com/article/389219)
Supplement: Supplementary file 1 [file get_supplementary_file.php]

| **Additional Table 1**  **Design and methods: Studies that were published as abstracts** | | | | | |
| --- | --- | --- | --- | --- | --- |
| **Study** | **Design** | **Condition** | **Intervention** | **Experimental groups** | **LI-ESWT treatment** |
| Michel et al. [1] | Animal study  (rats) | Hypertensive, proteinuric renal disease induced by L-NAME | Left kidney treated 3 times per week for 5 weeks | 1) Hypertensive  2) Hypertensive + LI-ESWT | Information not available |
| Hanna et al. [2] | Animal study  (rats) | Diabetic renal disease induced by Streptozotozin injection | Both kidneys treated 3 times with two weeks interval using Storz Duolith SD1 device | 1) Non-diabetic  2) Diabetic  3) Non-diabetic +LI-ESWT  4) Diabetic + LI-ESWT | 2000 shocks per session at energy 0.25 mJ/mm2 and 4 hz |
| Lundrup et al. [3] | Clinical single-arm cohort study with 12 patients | Patients with renal allograft with proteinuria and eGFR 30-60 mL/min/1.73m2. Transplantation >1 year ago. | Kidney allograft treated 2 times per week for 3 weeks using Storz Duolith SD1 device | 1) Renal allograft + LI-ESWT | Kidney divided in upper, middle, and lower part. Each part treated with 1000 shocks per session at energy 0.20 mJ/mm2 and 4 hz |
| Bochorishvili et al. [4] | Clinical single-arm cohort study with 24 patients | Patients with diabetic renal disease and GFR 30-60 mL/min/1.73m2 | Both kidneys treated 3 times per week for 2 weeks using Storz Modulith SLK-3 device | 1) Diabetes + LI-ESWT | 3000 shocks distributed over 6 segments of each kidney. Energy at 0.32 mJ/mm2 and frequency 4 hz. |

| **Additional Table 2**  **Results: Studies that were published as abstracts** | |
| --- | --- |
| **Study** | **Main findings** |
| Michel et al. [1] | - LI-ESWT reduced glomerular, vascular, and interstitial lesions as well as renal resistive index and macrophage and lymphocyte infiltration - The blood flow in interlobular renal arteries was increased after LI-ESWT |
| Hanna et al. [2] | - There was no significant effect of LI-ESWT treatment on diabetic lesions |
| Lundrup et al. [3] | - LI-ESWT caused short-lasting macroscopic haematuria in 1 patient and local soreness in 5 patients (out of 12 patients) - No hematoma on ultrasound scanning after LI-ESWT. - There were no significant effects of LI-ESWT on GFR or 24-hour sample proteinuria |
| Bochorishvili et al. [4] | - LI-ESWT caused microscopic haematuria in all patients. Two out of 24 patients experienced pain in relation to LI-ESWT. No other side effects. - Creatinine levels were reduced immediately after each session - Median systolic blood pressure was reduced significantly at 12 months follow-up (150 mmHg at baseline versus 130 mmHg at 12 months) - Plasma creatinine levels reduced slightly from 132 micromole/L at baseline to 129.5 micromole at 12 months follow-up (p>0.05). - At 3 months follow-up, the right kidney volume was increased 14 cm3 (10%) and the left kidney volume was increased 13 cm3 (9%). The enlargement of both kidneys was evident until 12 months follow-up. - Doppler scan showed significantly increased renal artery systolic blood flow velocity at 1 month (left side) and 3 months (both sides). |

**References**

1. Michel PA, Bonin P, Bige N, Ronco P, Dussaule JC, Chatziantoniou C, et al. Effects of shock wave therapy in chronic kidney diseases. Nephron Physiol. 2011;1):p12.

2. Hanna M, Pedersen D, Lund M, Marcussen N, Lund L. Low energy ESWT, a novel treatment for diabetic nephropathy (animal study). J Endourol. 2012;1):A6.

3. Lundrup RN, Skov-Jeppesen SM, Bistrup C, Jensen B, Yderstraede K, Lund L. Safety and effect of low-energy extracorporeal shockwave therapy (ESWT) on the renal allograft in transplant recipients-preliminary results. Scand J Urol. 2019;53 (Supplement 221):4.

4. Aleksandre B, Andro D, Milad H, Lund L, Elene G, Shota J, et al. Low intensity shock waves in the treatment of diabetic nephropaty: prospective, phase 1 study, Georgian arm. Eur Urol Suppl. 2019;18 (12):e3635-e6.
